# Supplementary material for: Prevention of polydimethylsiloxane microsphere migration using a mussel-inspired polydopamine coating for potential application in injection therapy
Source: PubMed Central journal article supplement (PMC5667927; doi:10.1371/journal.pone.0186877), 2017-11-02
Supplement: pone.0186877.s001.pdf [file pone.0186877.s001.pdf]

## Supporting Information

### Prevention of polydimethylsiloxane microsphere migration using a mussel-inspired polydopamine coating for potential application in injection therapy

Eun-Jae Chung<sup>1,†</sup>, Dae-Ryong Jun<sup>2,†</sup>, Dong-Wook Kim<sup>1</sup>, Mi-Jung Han<sup>1</sup>, Tack-Kyun Kwon<sup>1</sup>, Sung-Wook Choi<sup>2,\*</sup>, and Seong-Keun Kwon<sup>1,\*</sup>

<sup>1</sup>Department of Otorhinolaryngology, College of Medicine, Seoul National University Hospital, Seoul, Korea

<sup>2</sup>Department of Biotechnology, The Catholic University of Korea, Gyeonggi-do, Korea

\*Corresponding authors

E-mail: otolarynx@snuh.org (S-K Kwon) and choisw@catholic.ac.kr (S-W Choi)

<sup>†</sup>These authors contributed equally to this work.

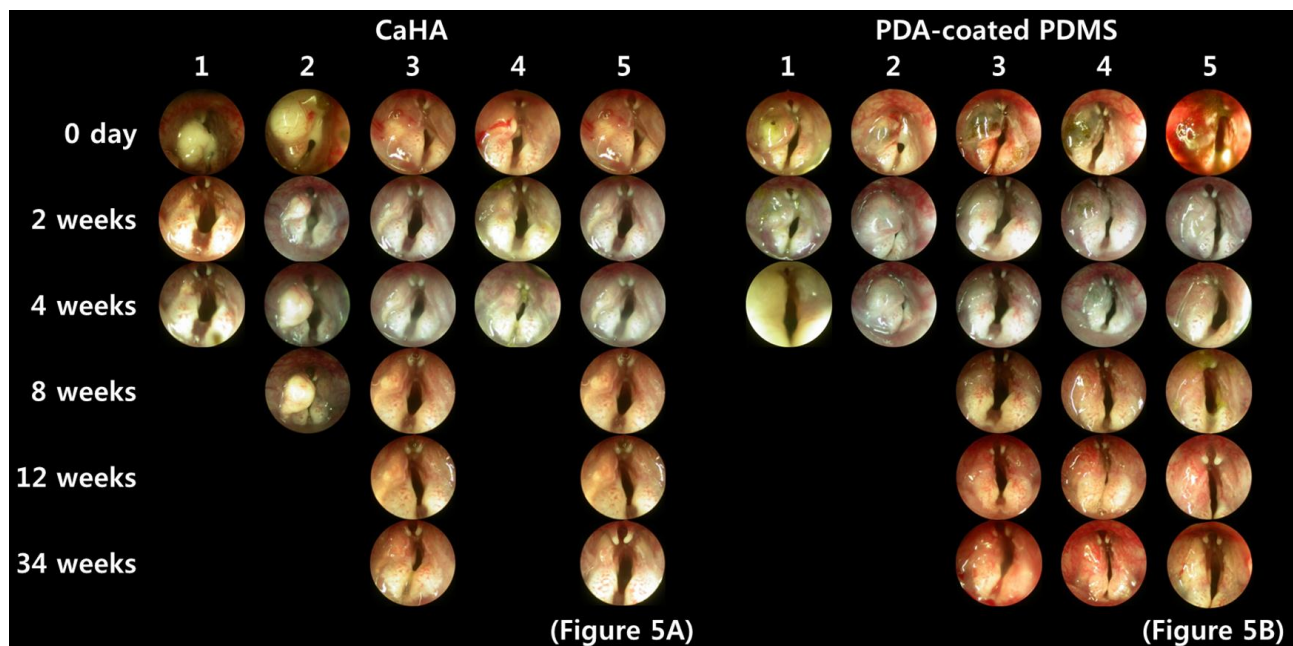

**S1 Fig.** Serial endoscopic analysis of a larynx injected with CaHA (A, n=5) and PDA-coated PDMS groups (B, n=5).
